# Supplementary material for: Pharmacological Inhibition of PP2A Overcomes Nab-Paclitaxel Resistance by Downregulating MCL1 in Esophageal Squamous Cell Carcinoma (ESCC)
Source: MDPI journal article supplement (doi:10.3390/cancers13194766), 2021-09-23

Original western blot images

## Full unedited blots for Figure 2A

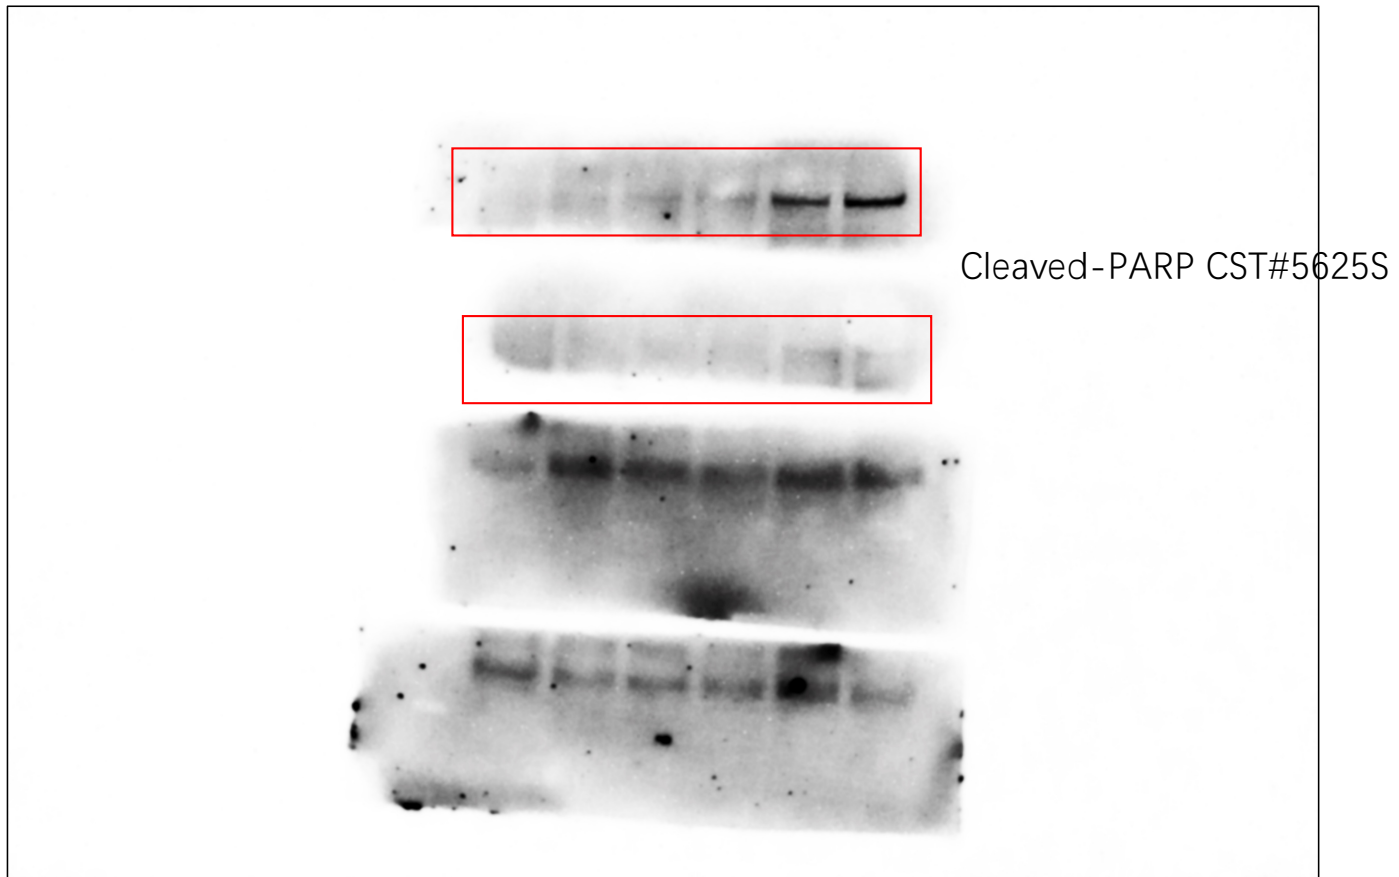

Full unedited blots for Figure 2A

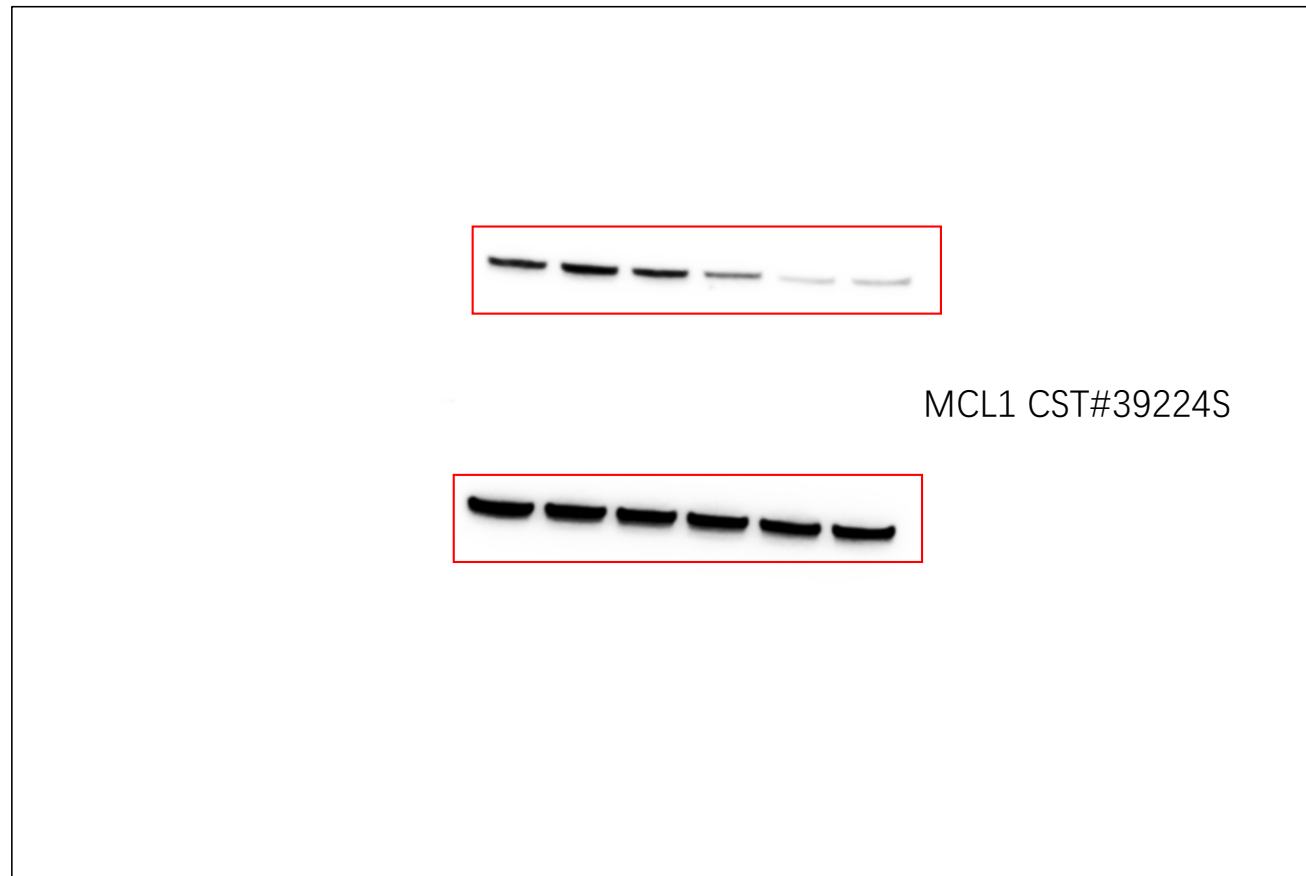

Full unedited blots for Figure 2A

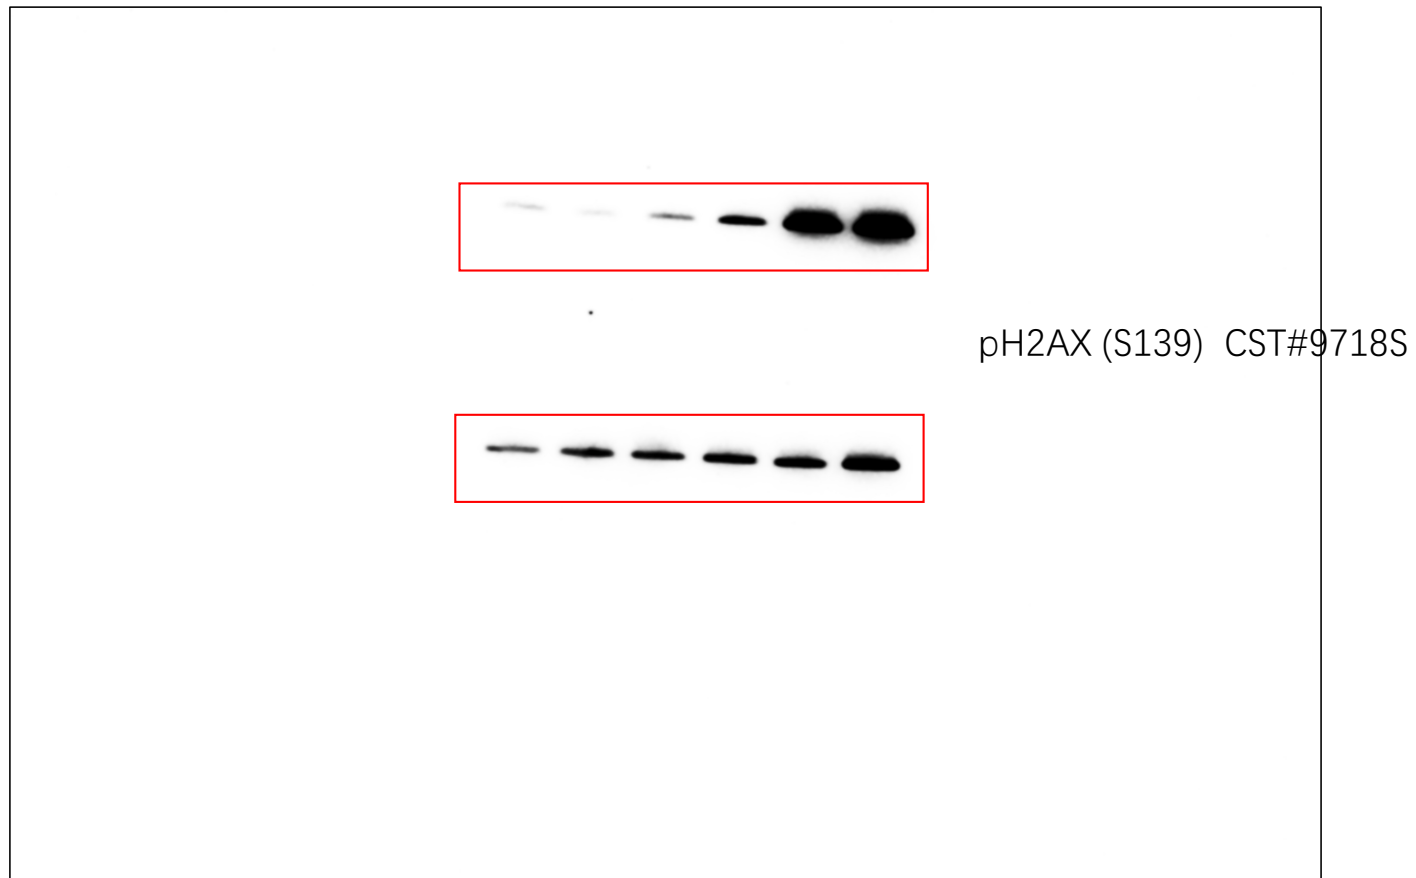

Full unedited blots for Figure 2A

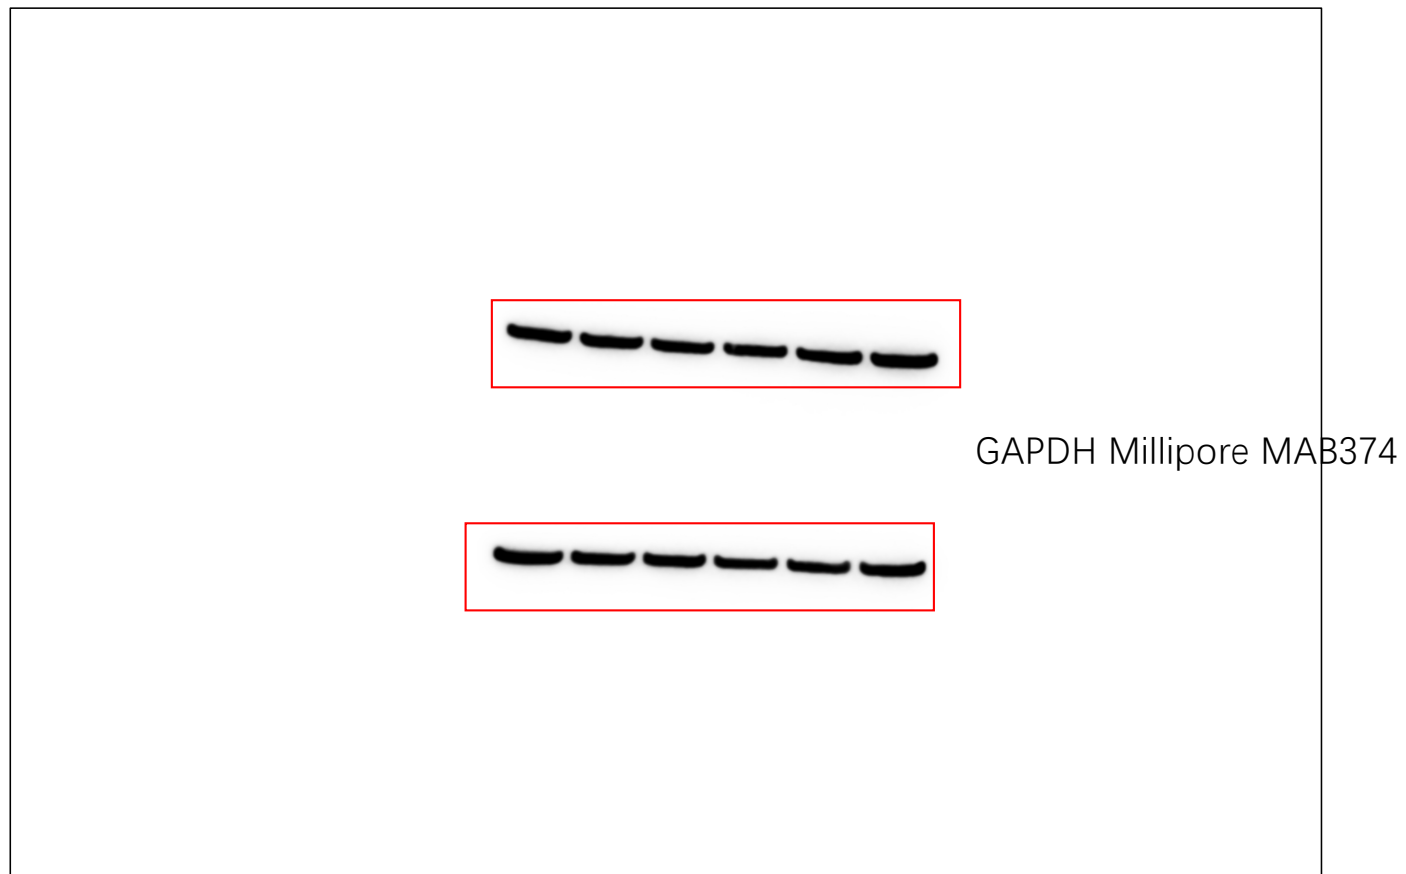

Full unedited blots for Figure 2B

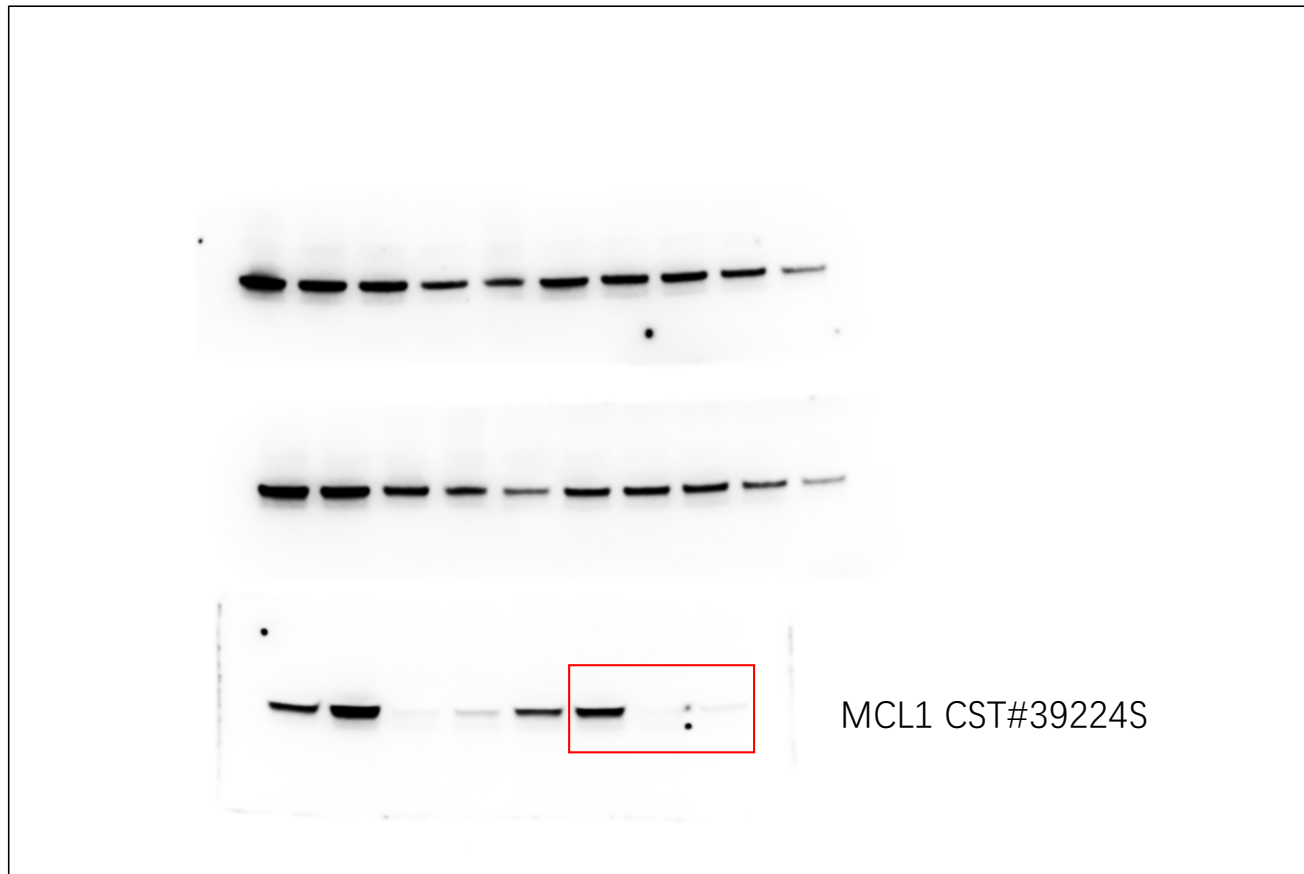

Full unedited blots for Figure 2B

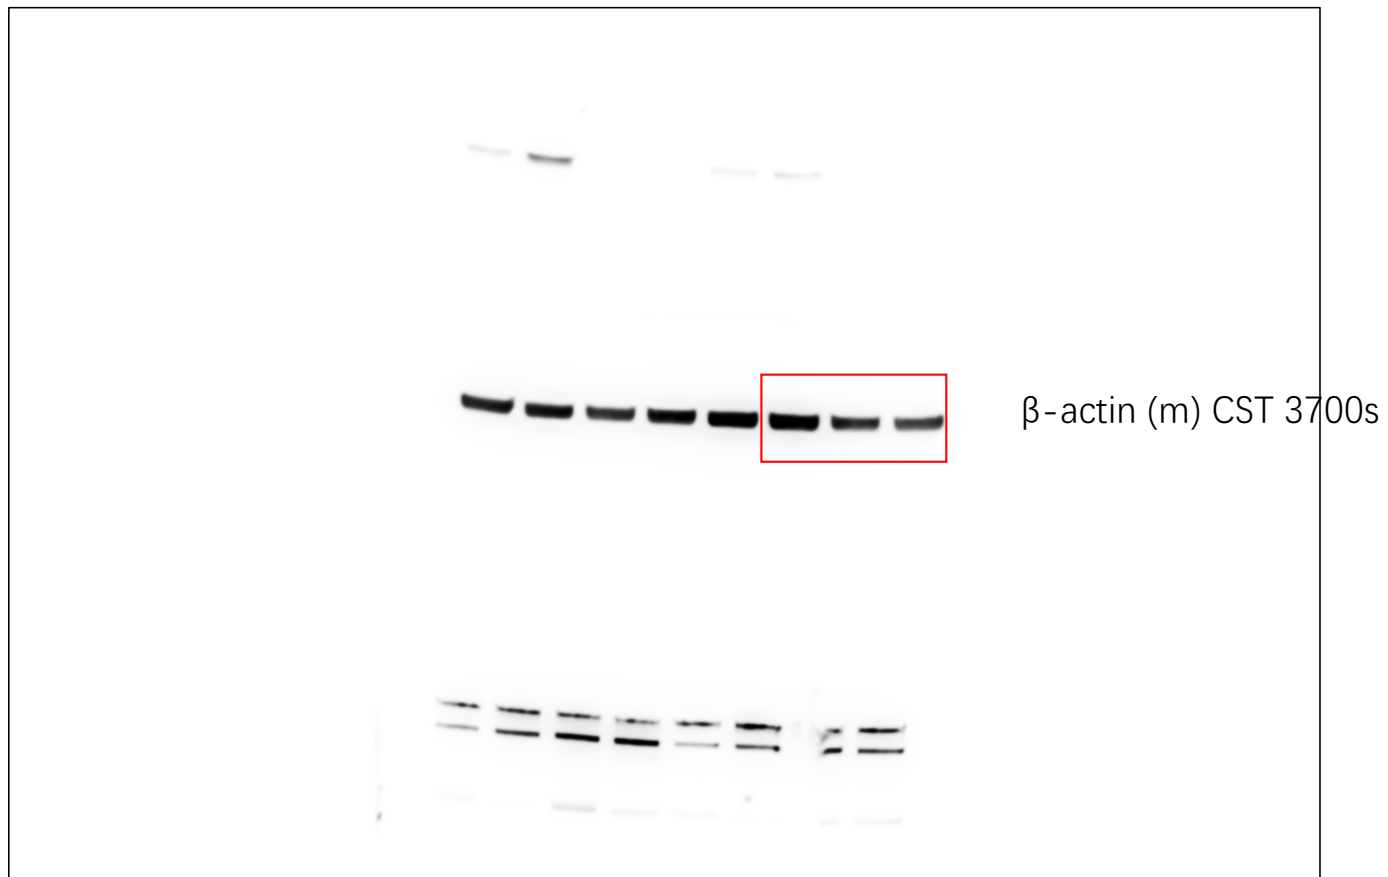

## Full unedited blots for Figure 3C

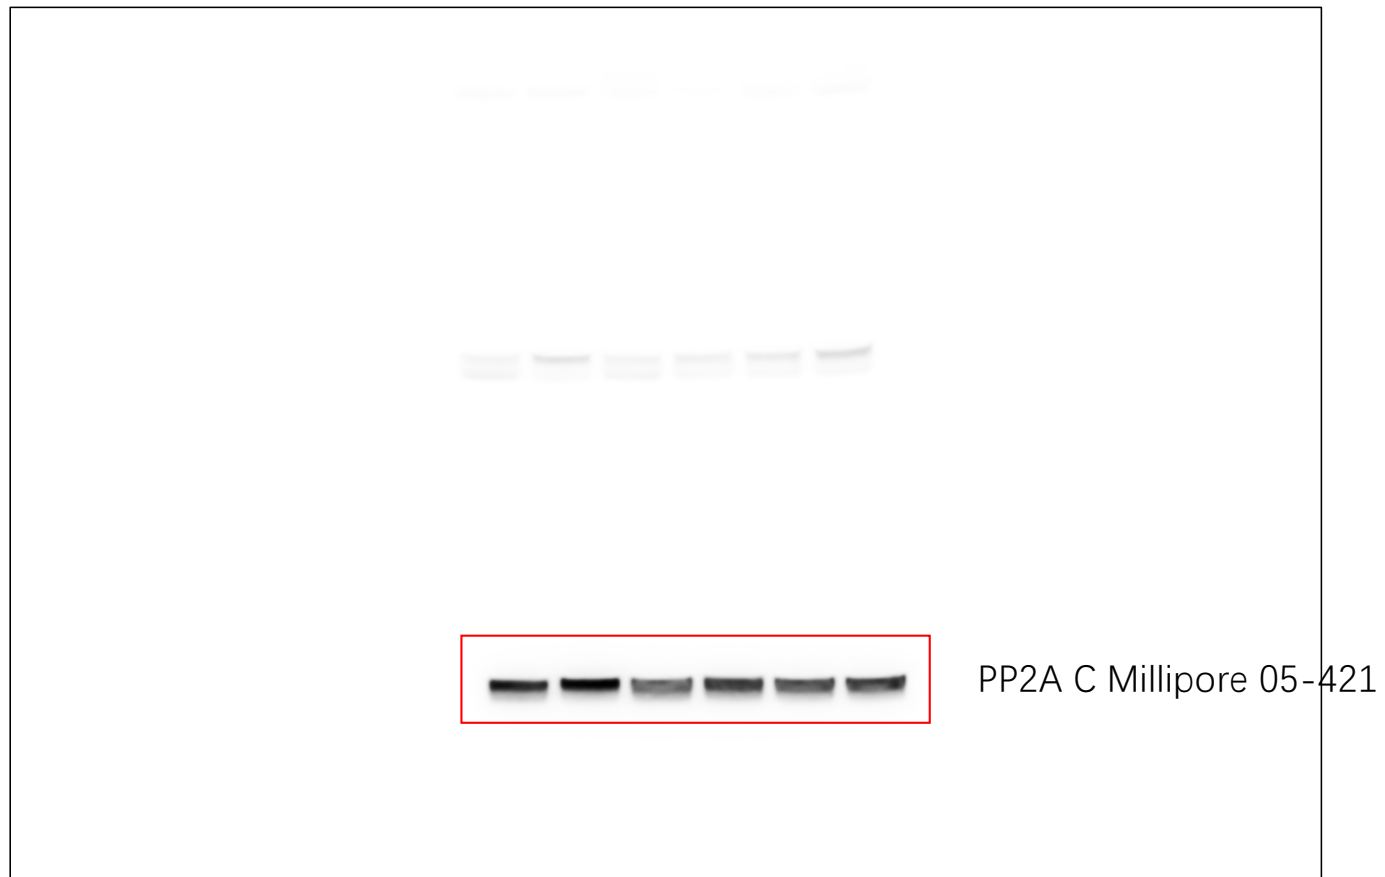



Full unedited blots for Figure 3C

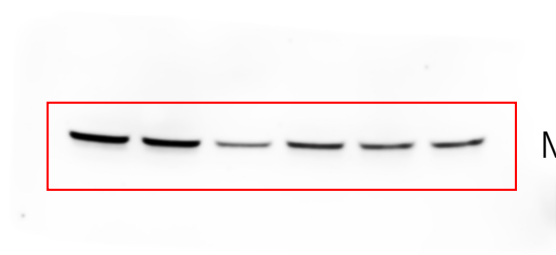

MCL1 CST#39224S

## Full unedited blots for Figure 3C

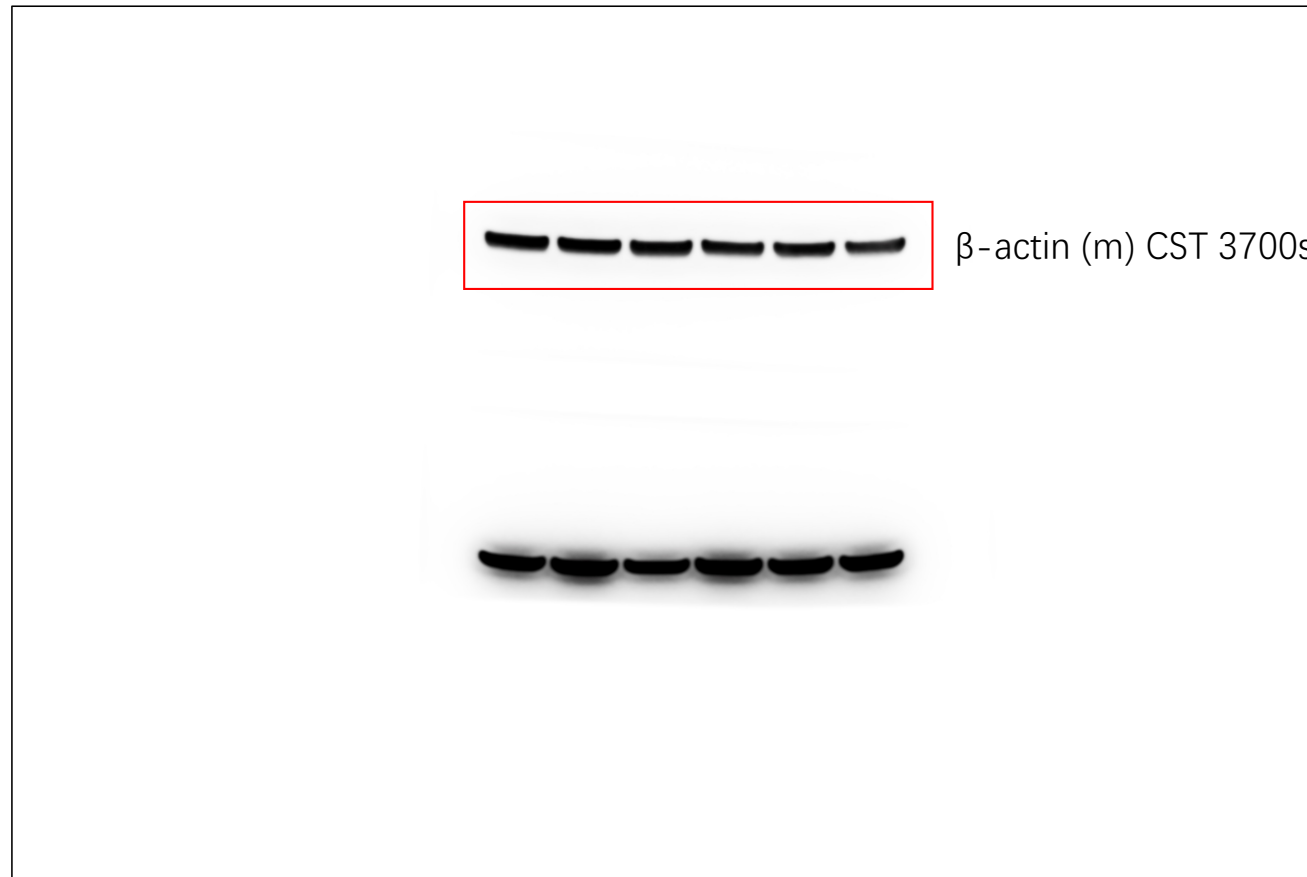

Full unedited blots for Figure 3D

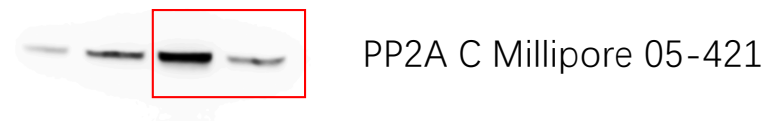

## Full unedited blots for Figure 3D

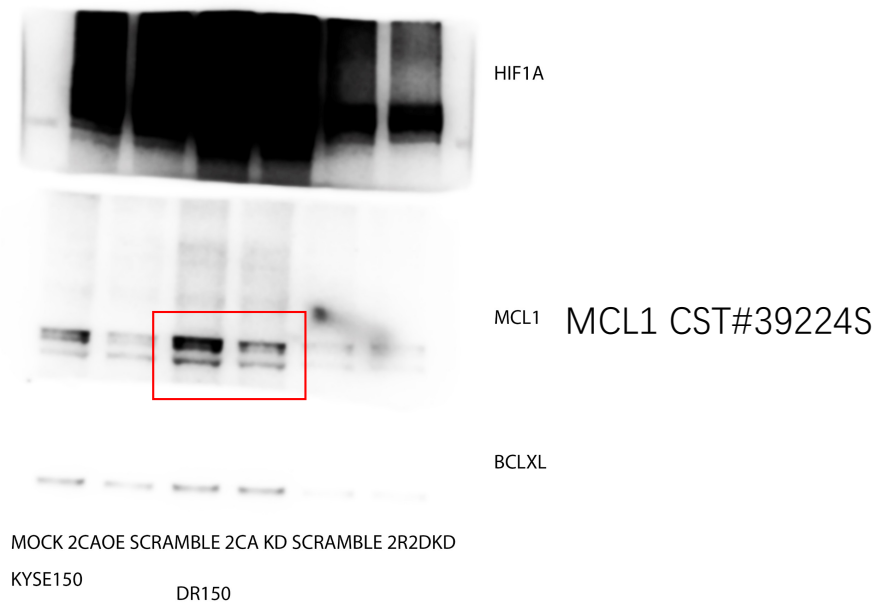

Full unedited blots for Figure 3D

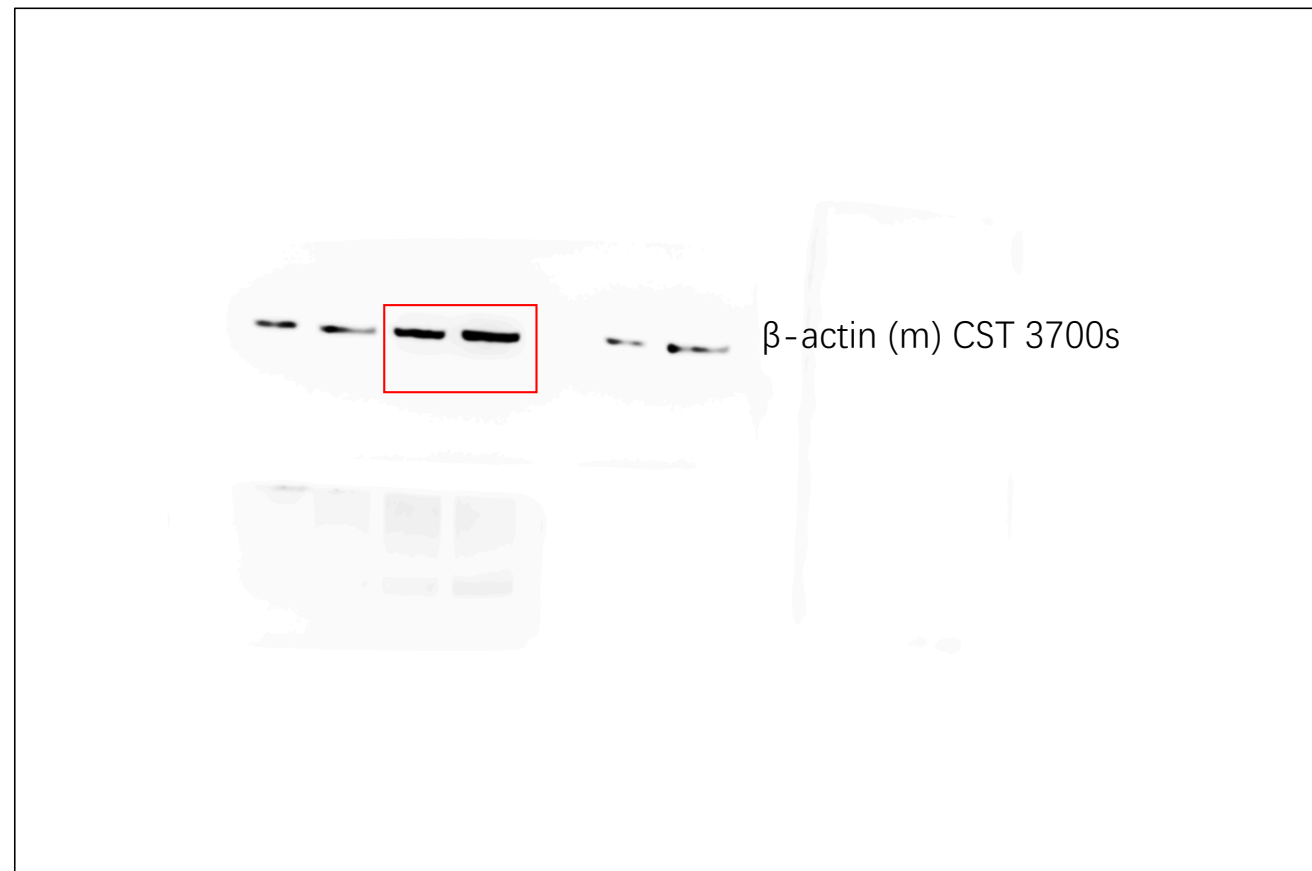

## Full unedited blots for Figure 4B

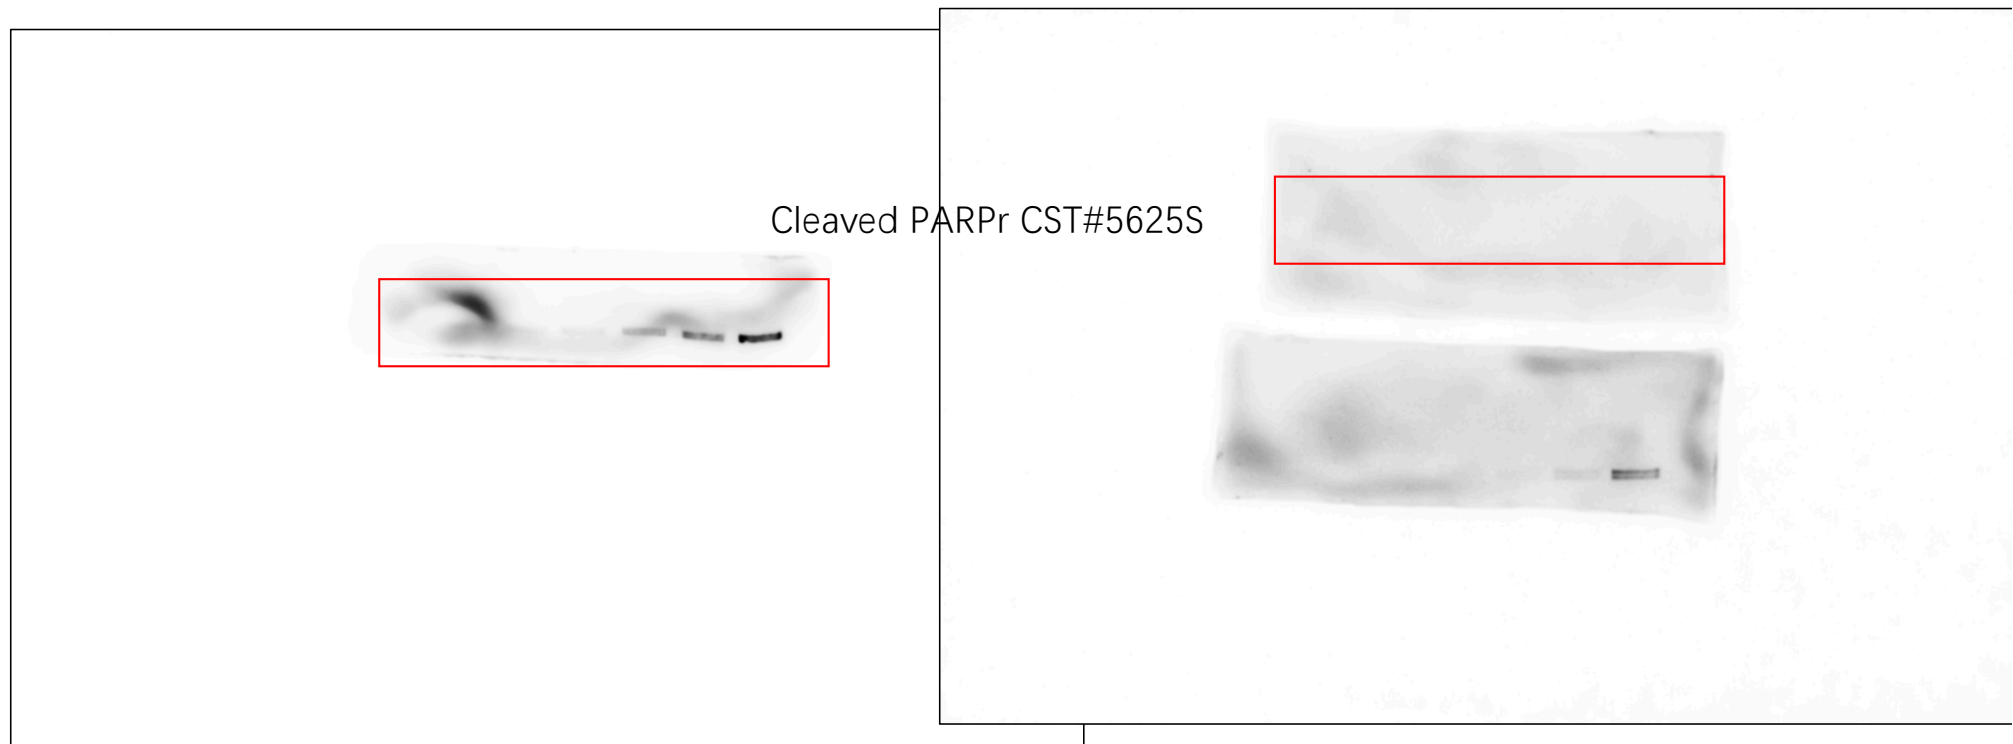

Full unedited blots for Figure 4B

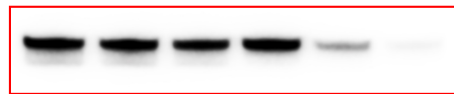

MCL1 CST#39224S

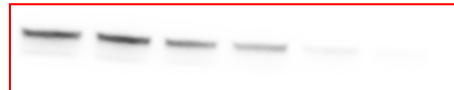

Full unedited blots for Figure 4B

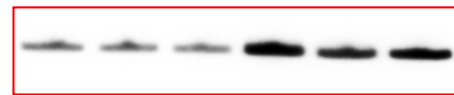

pH2AX (S139) CST#9718S

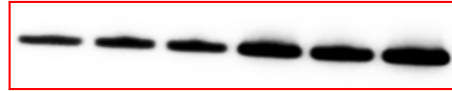



Full unedited blots for Figure 4B

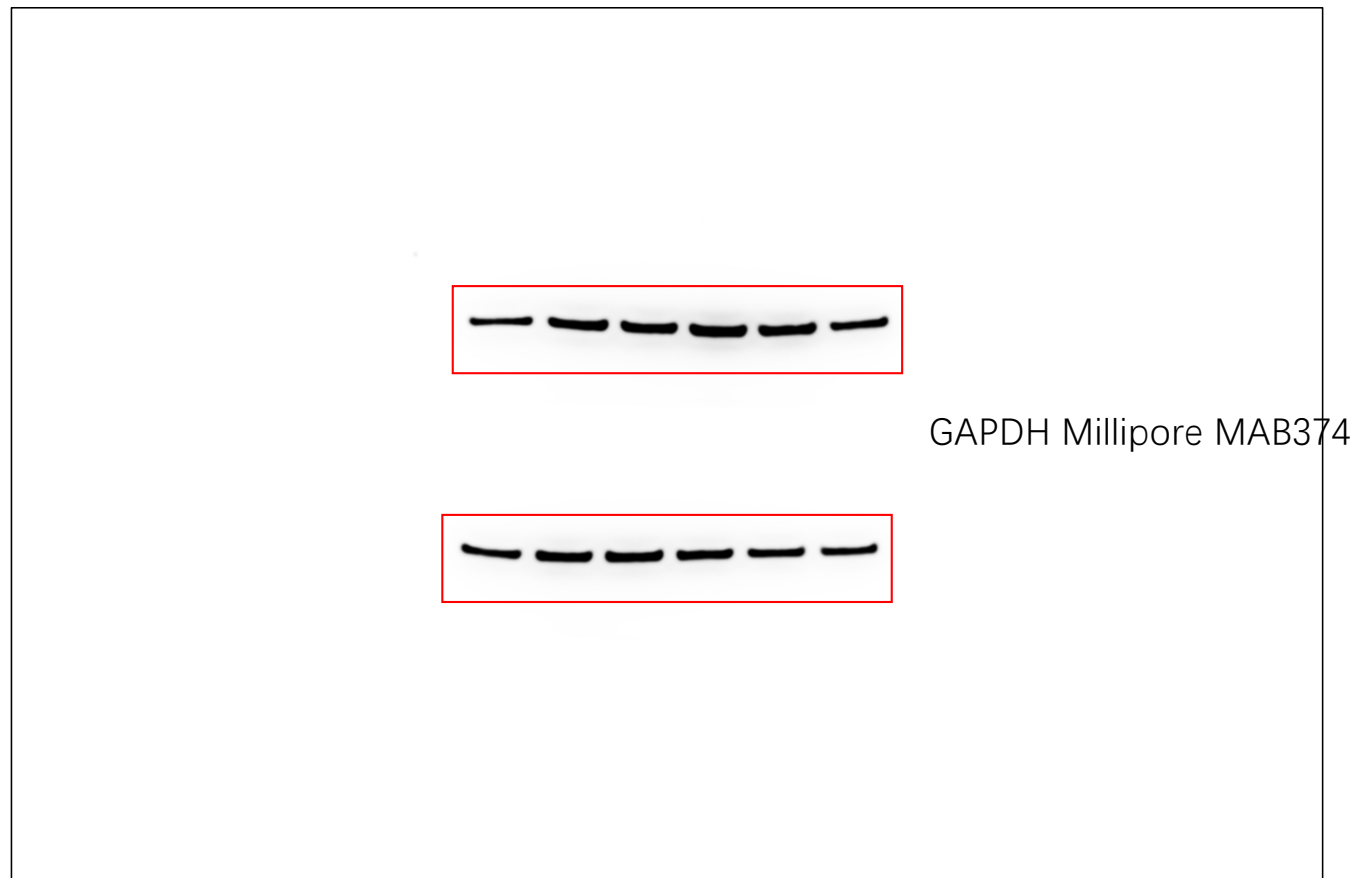

Full unedited blots for Figure 4C

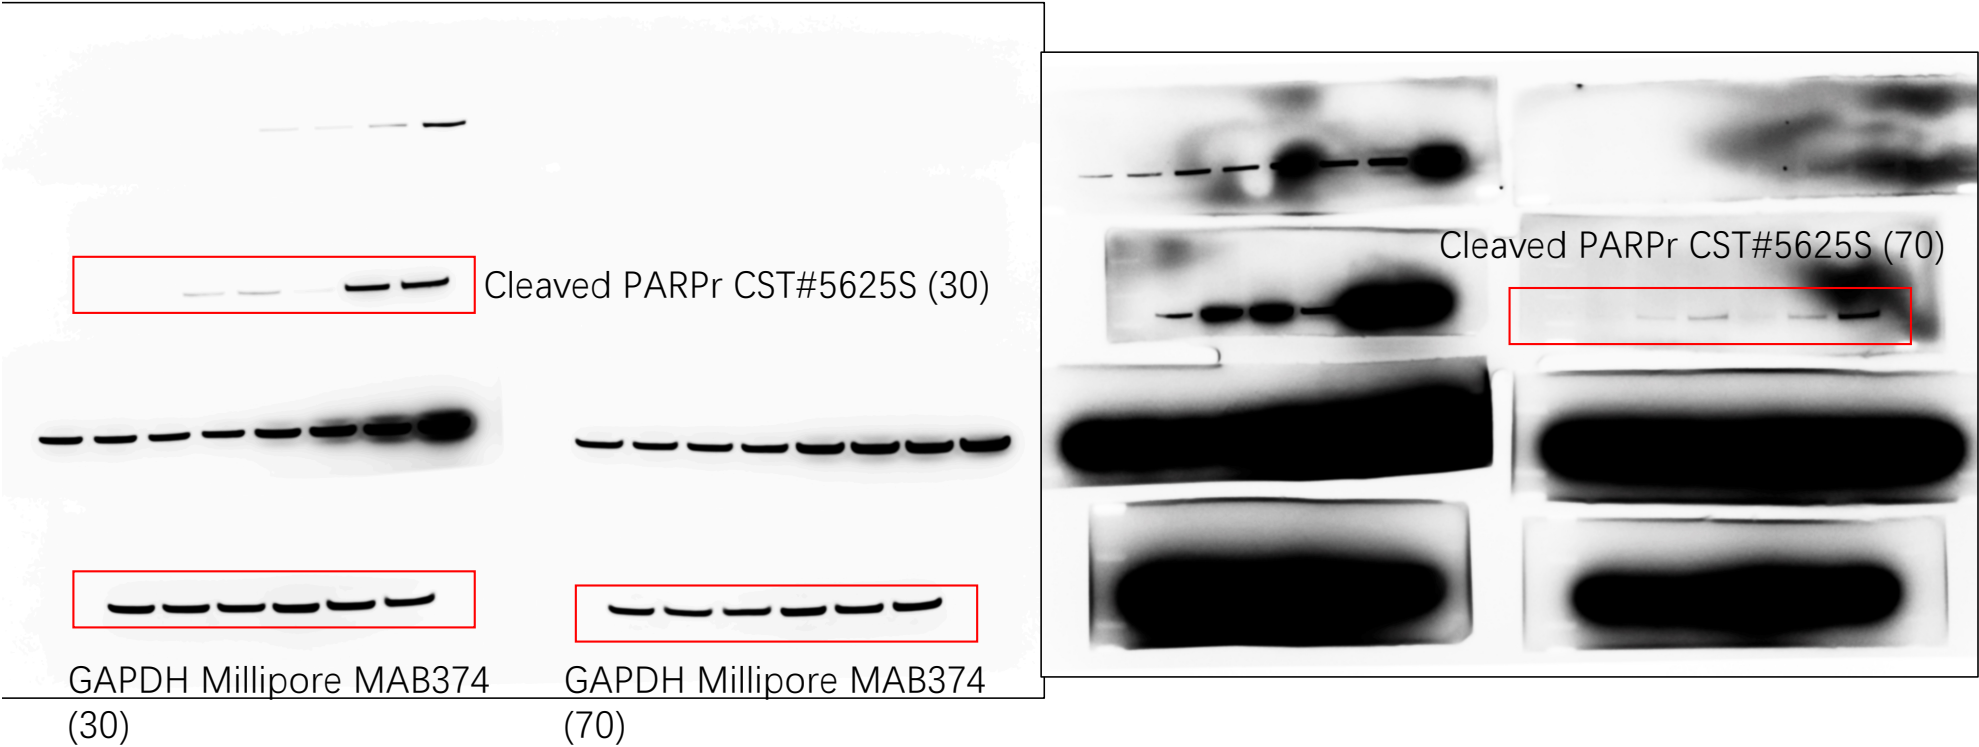

# Full unedited blots for Figure 4C

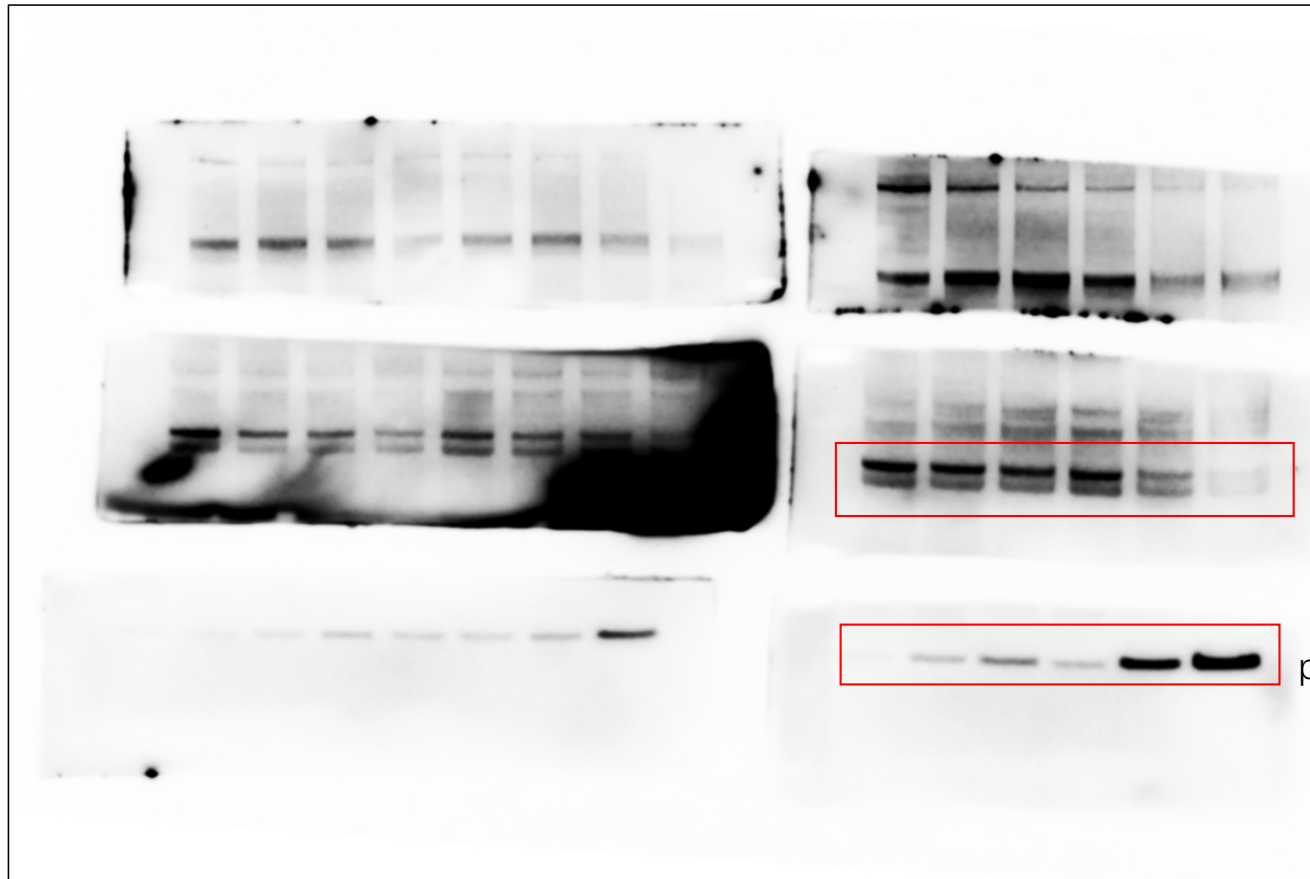

MCL1 CST#39224S (30)

pH2AX (S139) CST#9718S (30)

Full unedited blots for Figure 4C

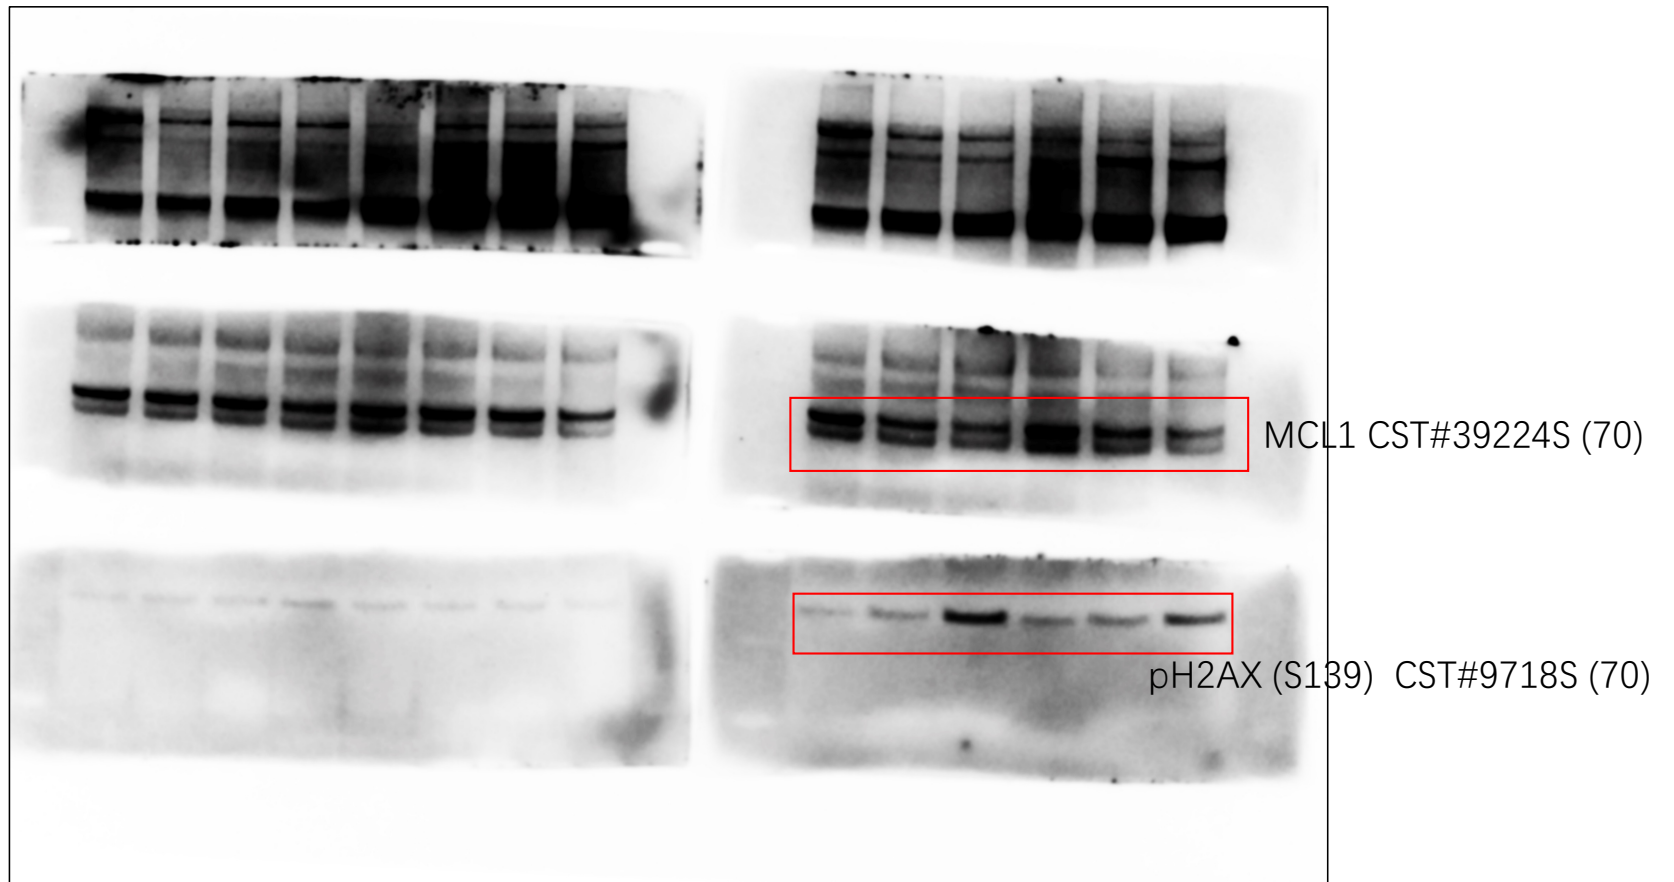

Supplement: s1 [file s1]
